# Supplementary material for: Preferential intermolecular interactions in a racemic mixture of amino acid Schiff base, conformational structures in solid state, and DFT studies
Source: Royal Society of Chemistry journal article supplement (doi:10.1039/d0nj04720a), 2020-12-15
Supplement: d0nj04720a1.pdf [file d0nj04720a1.pdf]

**Preferential intermolecular interactions in a racemic mixture of amino acid Schiff base, conformational structures in solid state and DFT studies.**

Jesús A. Lara-Cerón,<sup>a,\*</sup> Víctor M. Jiménez-Pérez,<sup>a</sup> Areli A. Molina-Paredes,<sup>a</sup> Mario Sánchez,<sup>b</sup> H. V. Rasika Dias,<sup>c</sup> Pedro I. Ramirez-Montes,<sup>d</sup> Blanca M. Muñoz-Flores.<sup>a,\*</sup>

<sup>a</sup> Universidad Autónoma de Nuevo León, Facultad de Ciencias Químicas, Ciudad Universitaria, Av. Universidad s/n. C. P. 66451, Nuevo León, México.

<sup>b</sup> Centro de Investigación en Materiales Avanzados, S.C., Alianza Norte 202, PIIT, Carretera Monterrey-Aeropuerto Km. 10, C. P. 66628, Apodaca, Nuevo León, México.

<sup>c</sup> Department of Chemistry and Biochemistry, The University of Texas at Arlington, Arlington, Texas 76019-0065, USA.

<sup>d</sup> Universidad Nacional Autónoma de México, Facultad de Estudios Superiores Cuautitlán, Departamento de Matemáticas, Carr. Cuautitlán-Teoloyucan Km. 2.5, San Sebastián Xhala, 54714 Cuautitlán Izcalli, México.

\* Corresponding author: Tel +52(81)83294000, ext. 3401; Fax: 52 (81)83760570.

E-mail: [jesus.laracr@uanl.edu.mx](mailto:jesus.laracr@uanl.edu.mx) (J. A. Lara-Cerón) and [blanca.munozfl@uanl.edu.mx](mailto:blanca.munozfl@uanl.edu.mx) (B. M. Muñoz-Flores).

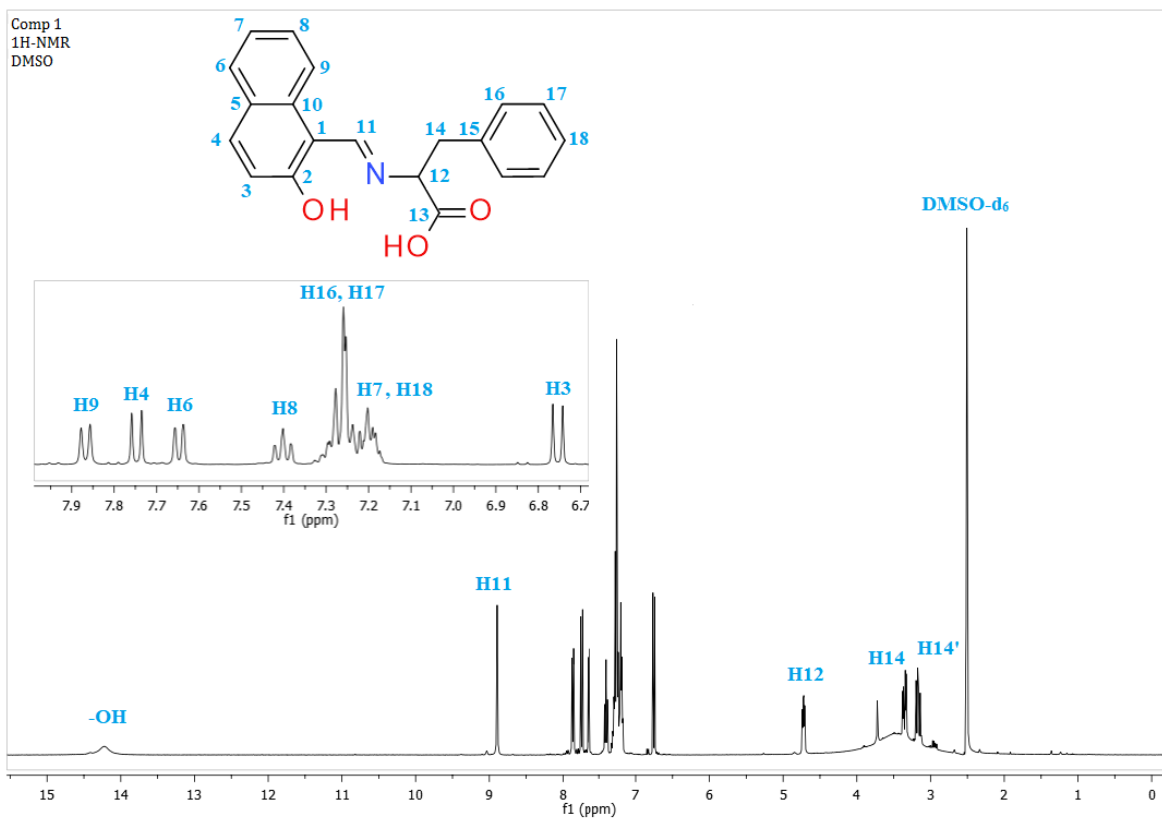

**Fig S 1.**  $^1\text{H}$  NMR spectrum of compound **1** in DMSO at 400MHz.

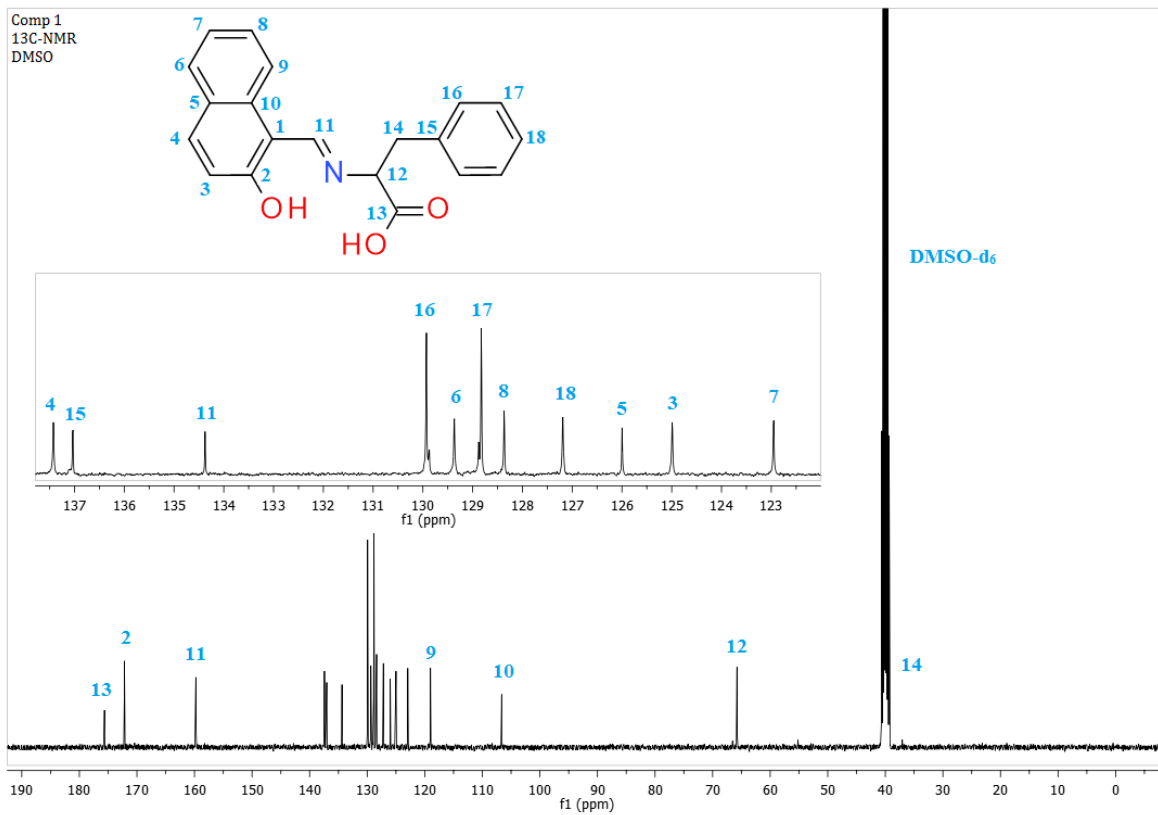

**Fig S 2.**  $^{13}\text{C}$  NMR spectrum of compound **1** in DMSO at 100MHz.

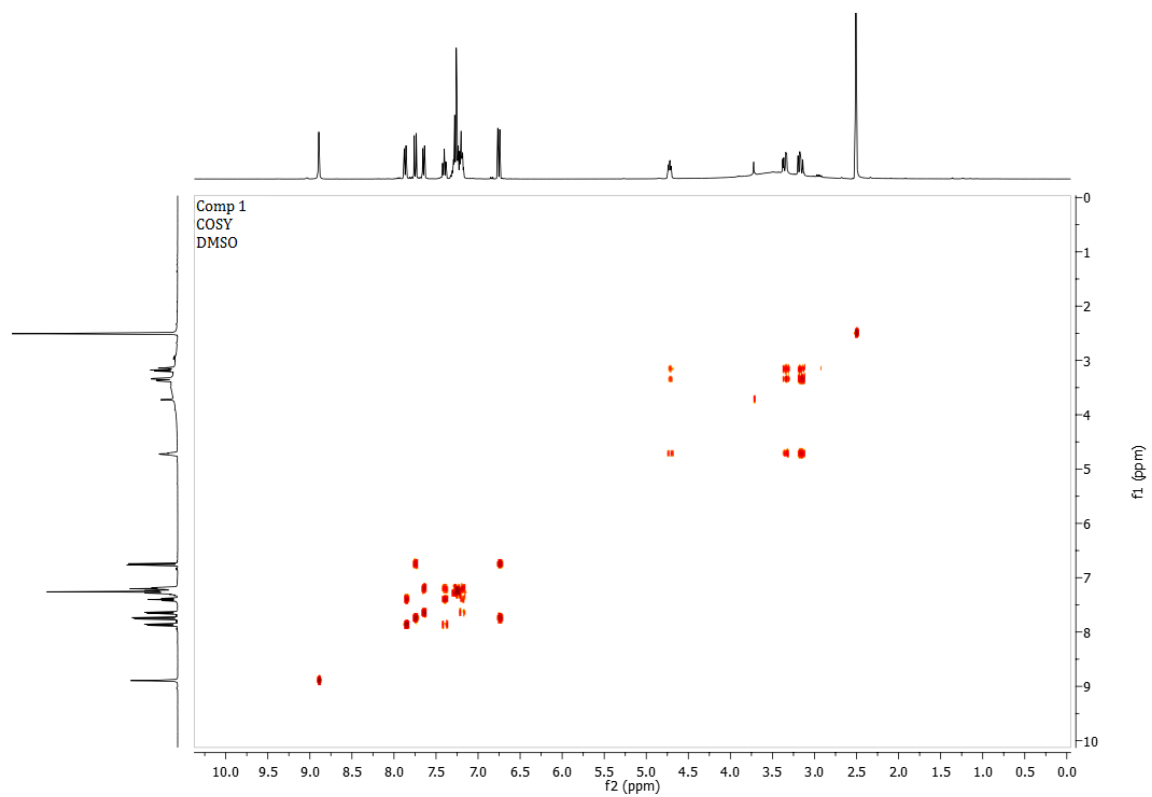

**Fig S 3.** COSY spectrum of compound **1** in DMSO.

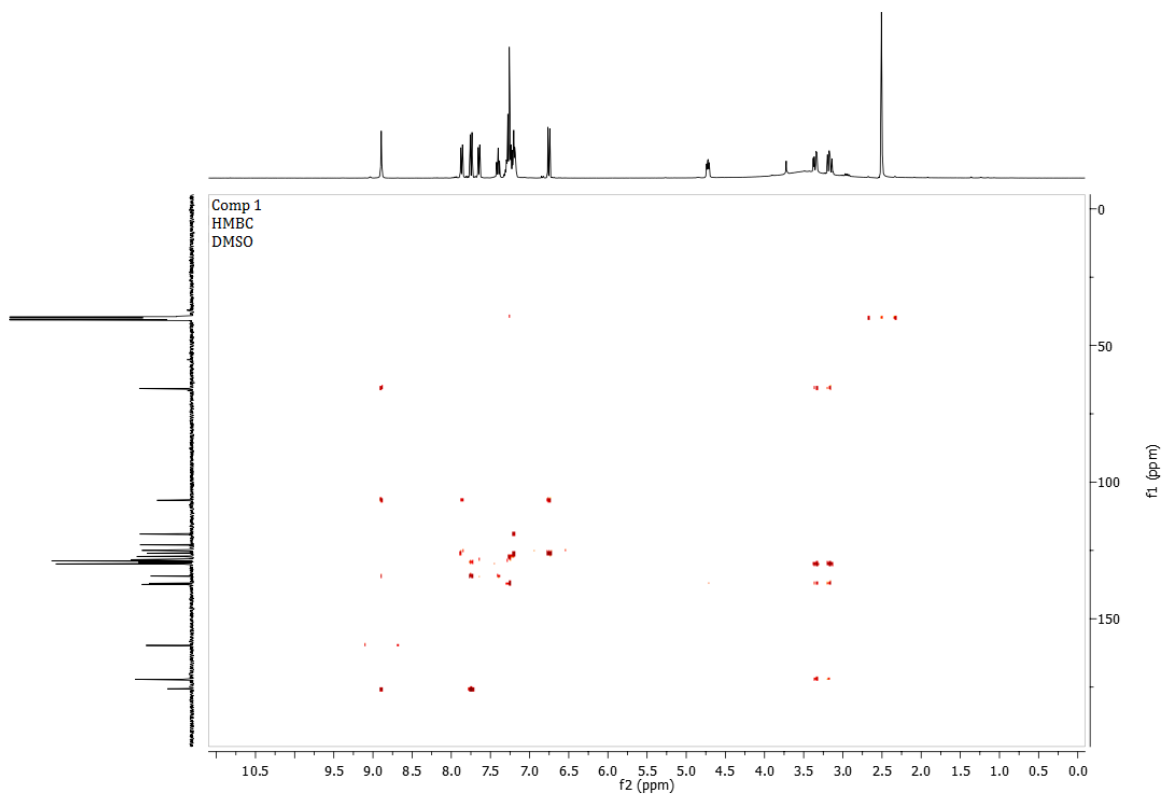

**Fig S 4.** HMBC spectrum of compound **1** in DMSO.

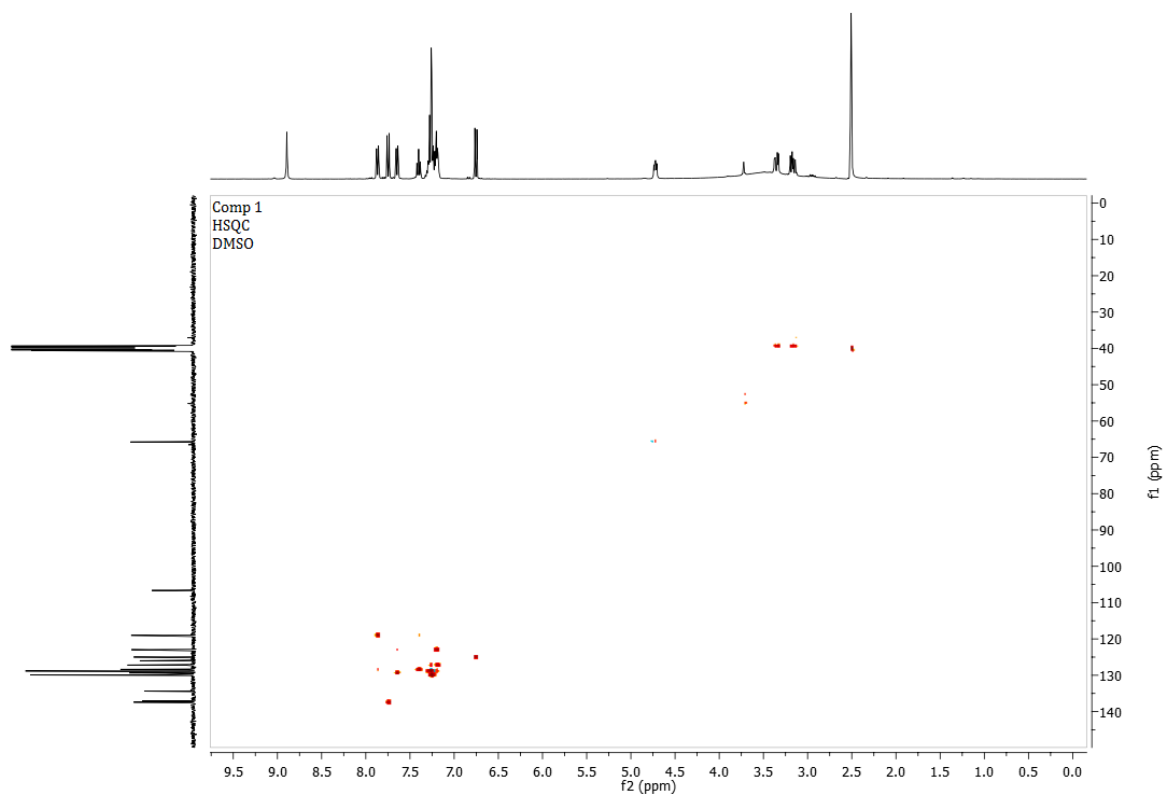

**Fig S 5.** HSQC spectrum of compound **1** in DMSO.

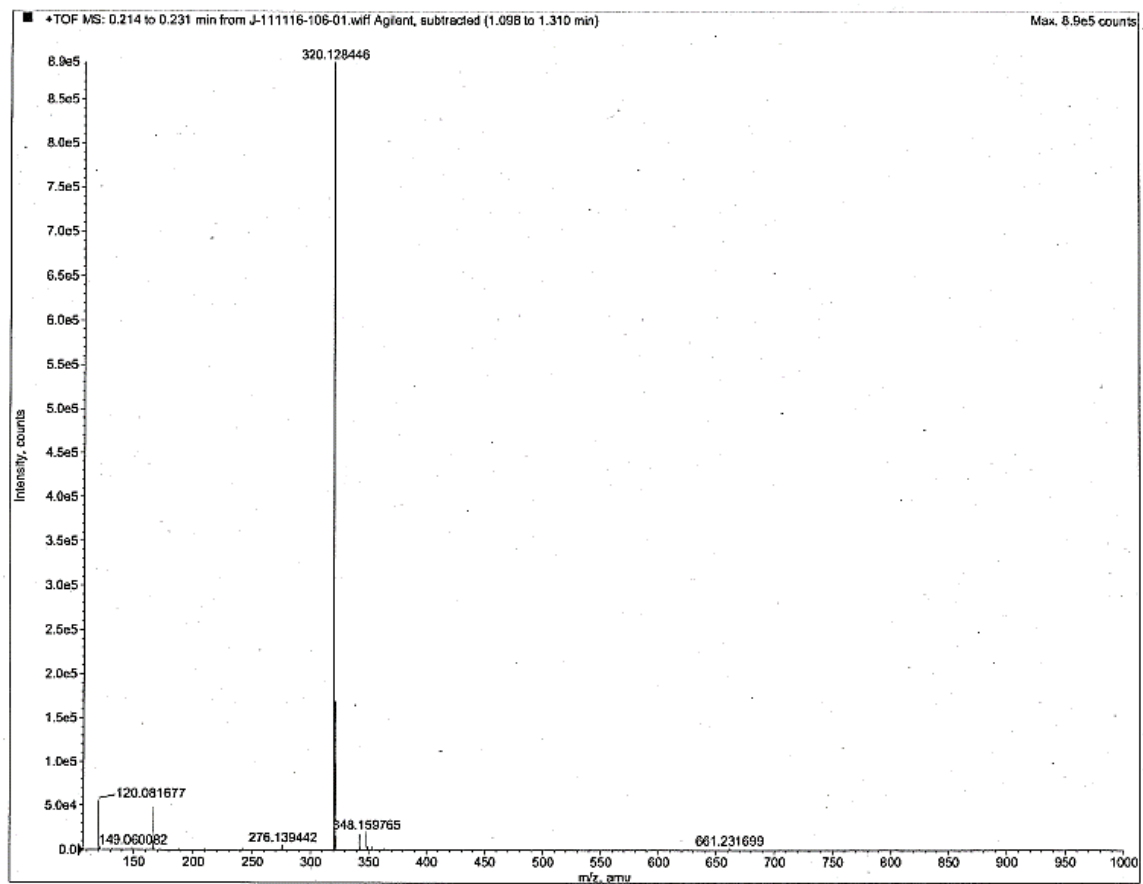

**Fig S 6.** Mass spectroscopy of compound **1**.

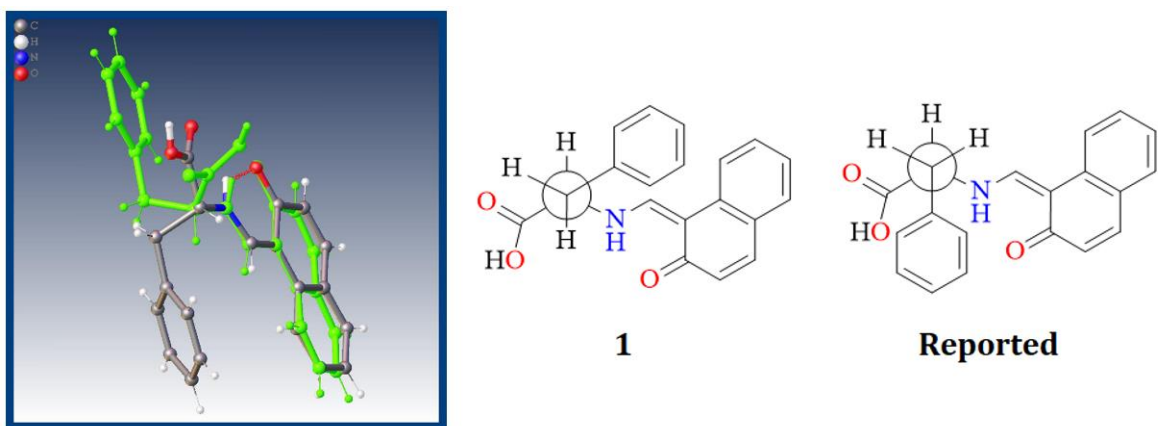

**Fig S 7.** Overlay visualization of conformers **1** and the reported (green) and their Newman projections.

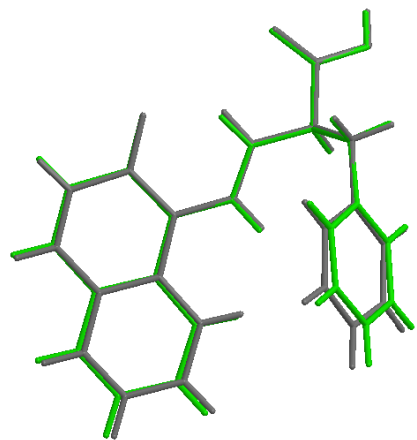

**Fig S 8.** Overlay visualization of the two crystallographically independent molecules in the asymmetric unit of **1**.



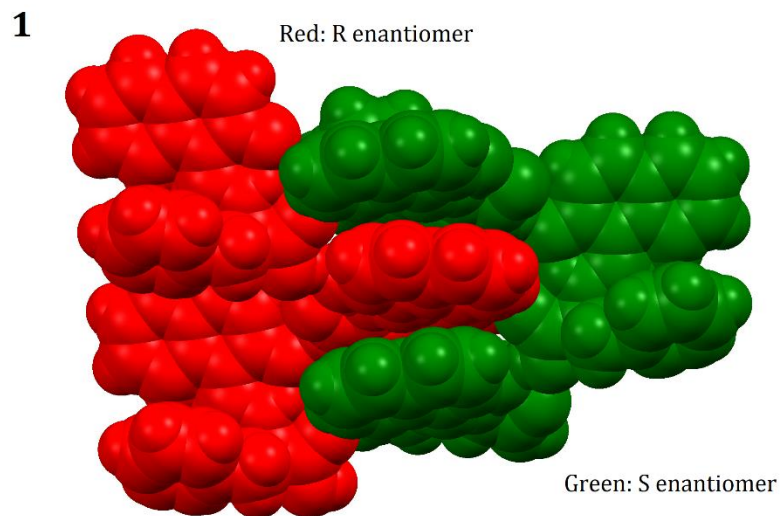

### Reported

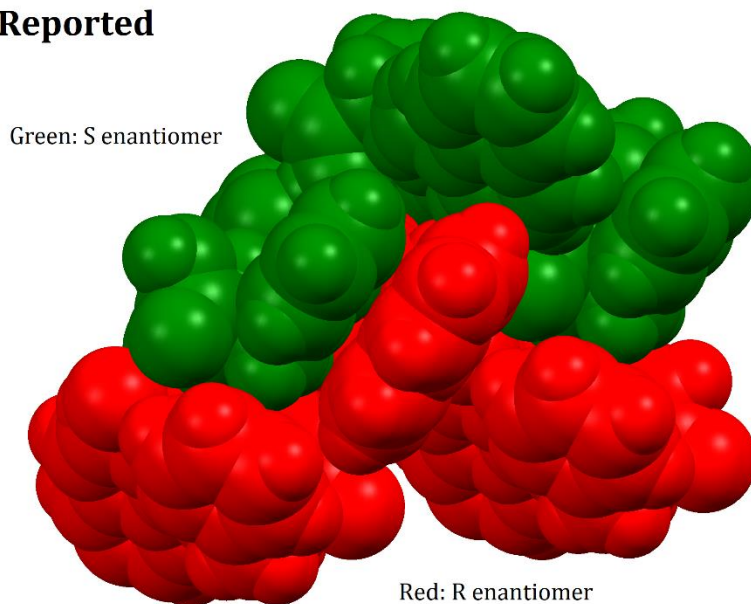

**Fig S 9.** Spacefill view of enantiomeric mixture in X-ray structures of **1** and previously reported.

**Table 1.** Statistical Data from the CSD for the tautomers phenol-imine and keto-amine, and values in angstroms (Å) for the X-ray structures of **1** and previously reported.

| Tautomer | O1-C2 | C2-C1 | C1-C11 | C11-N |
|----------|-------|-------|--------|-------|
|----------|-------|-------|--------|-------|

|                                       |       |       |       |       |
|---------------------------------------|-------|-------|-------|-------|
| Phenol-imine <sup>Error!</sup>        | 1.343 | 1.406 | 1.450 | 1.286 |
| Bookmark not defined.                 |       |       |       |       |
| Keto-amine <sup>Error!</sup> Bookmark | 1.291 | 1.431 | 1.414 | 1.303 |
| not defined.                          |       |       |       |       |
| <b>1</b>                              | 1.286 | 1.425 | 1.411 | 1.307 |
| Reported <sup>18</sup>                | 1.300 | 1.420 | 1.411 | 1.303 |

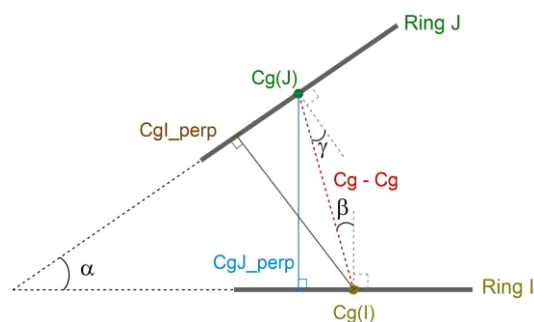

**Fig S 10.** Sketch of the geometrical parameters in *edge-to-face* or *face-to-face* interactions as calculated in PLATON, where Cg(I) = geometrical center of the I ring, Cg(J) = geometrical center of the J ring. Cg-Cg = distance between Cg(I) and Cg(J),  $\alpha$  = angle between the ring planes,  $\beta$  = angle between the Cg-Cg vector and the normal to the ring plane I.  $\gamma$  = angle between Cg-Cg vector and the normal to the ring plane J. CgJ\_perp = perpendicular distance between Cg(J) and ring I. CgI\_perp = perpendicular distance between Cg(I) and ring J.

**Table 2.** Geometrical parameters for the  $\cdot\pi \cdots \pi$  interactions observed on the crystal packing of compound **1**.

|         | Interaction                            | Cg $\cdots$ Cg (Å) | $\alpha$ (°) | $\beta$ (°) | $\gamma$ (°) | CgI_Perp (Å) | CgJ_Perp(Å) |
|---------|----------------------------------------|--------------------|--------------|-------------|--------------|--------------|-------------|
| Form I  | Ph - Naph <sup>i</sup>                 | 3.5306(9)          | 3.28(6)      | 2.1         | 2.8          | 3.5262(7)    | 3.5282(5)*  |
|         | Naph mol 1 – Naph mol 2 <sup>ii</sup>  | 4.9110(18)         | 62.52(11)    | 8.5         | 69.7         | 1.7017(12)   | 4.8576(12)  |
| Form II | Naph mol 2 – Naph mol 1 <sup>iii</sup> | 4.9214(17)         | 60.76(11)    | 9.0         | 67.0         | 1.9241(12)   | 4.8615(12)  |
|         | Ph mol 2 – Ph mol 1 <sup>iv</sup>      | 4.767(3)           | 42.3(2)      | 21.9        | 62.0         | 2.2409(17)   | 4.423(2)    |

\* Slippage of 0.130 Å

i = 1 -x, -y, 1 -z; ii = -1/2 + x, 1/2 - y, -1/2 + z; iii = 1/2 + x, -1/2 + y, 1 + z; iv = -1/2 + x, 1/2 -y, 1/2 + z;

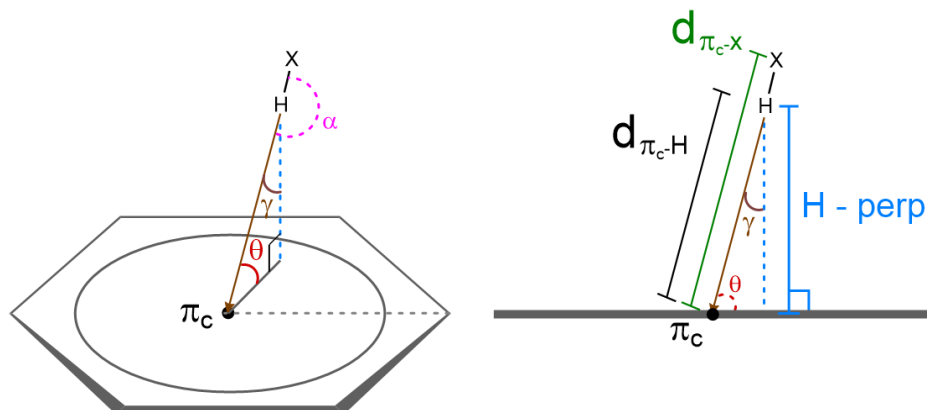

**Fig S 11.** Geometrical parameters in C-H $\cdots$  $\pi$  interactions where  $\pi_c$  = carbon atoms centroid,  $d_{\pi_c-H}$  = distance between  $\pi_c$  and the hydrogen atom,  $d_{\pi_c-X}$  = distance between  $\pi_c$  and the X (Carbon) atom, H - perp = perpendicular distance between hydrogen atom and  $\pi_c$ ,  $\theta$  = angle of the C-H bond with ring plane,  $\gamma$  = angle between  $\pi_c$  and the H atom vector with plane normal,  $\alpha$  = angle X-H  $\cdots$   $\pi_c$ .

**Table 3.** Geometrical parameters for the C-H $\cdots$  $\pi$  interactions observed on the crystal packing of compound **1** (Form II).

| Interaction                                | $d_{\pi_c-H}$ (Å) | H-Perp (Å) | $\gamma$ (°) | $\alpha$ (°) | $d_{\pi_c-X}$ (Å) | $\theta$ (°) |
|--------------------------------------------|-------------------|------------|--------------|--------------|-------------------|--------------|
| C2-H2 $\cdots$ Naph mol 1 <sup>i</sup>     | 2.73              | 2.68       | 10.15        | 151          | 3.613(4)          | 57           |
| C7-H7 $\cdots$ Naph mol 2 <sup>ii</sup>    | 2.83              | 2.73       | 15.40        | 138          | 3.573(4)          | 60           |
| C22-H22 $\cdots$ Naph mol 2 <sup>iii</sup> | 2.90              | -2.74      | 19.28        | 157          | 3.817(4)          | 59           |

\* Slippage of 0.130 Å

i = x, 1 -y, 1/2 + z; ii = -1/2 + x, 1/2 + y, -1 + z; iii = x, -y, 1/2 + z

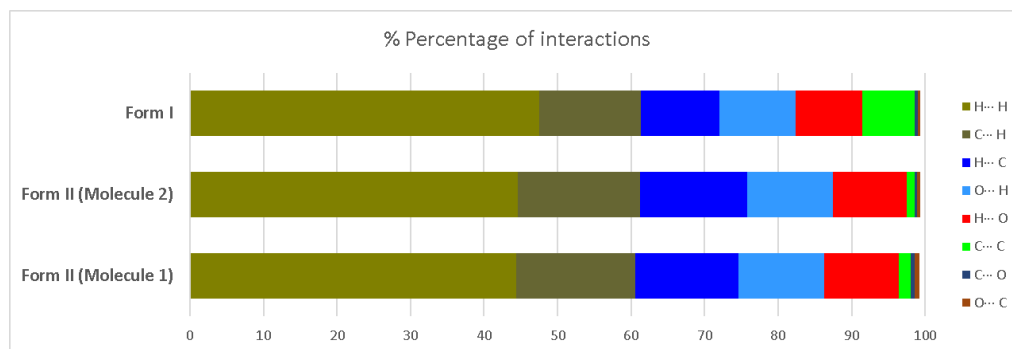

**Fig S 12.** Percentage of contribution to total observed atom promolecule interactions broken down by element type. For Form I and II of compound **1**.

**Table 4.** Percentage of contribution of each pair of elements to the fingerprint plot.

|    | Inside-<br>Outside | Form II    |            | Form I            |
|----|--------------------|------------|------------|-------------------|
|    |                    | Molecule 1 | Molecule 2 | %<br>Contribution |
| 1  | C... C             | 1.6        | 1.1        | 7.1               |
| 2  | C... N             | 0.3        | 0.2        | 0.0               |
| 3  | N... C             | 0.3        | 0.2        | 0.0               |
| 4  | C... H             | 16.2       | 16.6       | 13.8              |
| 5  | H... C             | 14.0       | 14.6       | 10.7              |
| 6  | C... O             | 0.6        | 0.3        | 0.4               |
| 7  | O... C             | 0.6        | 0.4        | 0.3               |
| 8  | N... N             | 0.0        | 0.0        | 0.0               |
| 9  | N... H             | 0.1        | 0.2        | 0.2               |
| 10 | H... N             | 0.1        | 0.2        | 0.2               |
| 11 | N... O             | 0.0        | 0.0        | 0.1               |
| 12 | O... N             | 0.0        | 0.0        | 0.1               |
| 13 | O... H             | 11.7       | 11.7       | 10.4              |
| 14 | H... O             | 10.1       | 10.0       | 9.1               |
| 15 | H... H             | 44.4       | 44.6       | 47.5              |

**Table 5.** Optimized structure coordinates of compound 1.

| Atomic number | x        | y        | z        |
|---------------|----------|----------|----------|
| 8             | -4.03973 | -2.32775 | -1.62156 |
| 1             | -4.46905 | -3.20044 | -1.60719 |
| 8             | -2.78247 | -3.35496 | -0.05123 |
| 8             | 0.322517 | -1.6345  | 2.114211 |
| 7             | -1.03549 | -1.19345 | -0.01016 |
| 6             | -3.04111 | -2.37606 | -0.7087  |
| 6             | -2.34418 | -1.02112 | -0.59309 |
| 1             | -2.23521 | -0.60083 | -1.59845 |
| 6             | 0.091755 | -0.7064  | -0.52461 |
| 1             | 0.001669 | -0.25708 | -1.51082 |
| 6             | 1.320322 | -0.72976 | 0.13465  |
| 6             | 1.344166 | -1.18827 | 1.524252 |
| 6             | 2.608629 | -1.08219 | 2.235862 |
| 1             | 2.607797 | -1.4115  | 3.26976  |
| 6             | 3.723629 | -0.60245 | 1.633023 |

|   |          |          |          |
|---|----------|----------|----------|
| 1 | 4.656554 | -0.53741 | 2.189396 |
| 6 | 3.737882 | -0.17252 | 0.257063 |
| 6 | 4.92693  | 0.303946 | -0.33092 |
| 1 | 5.825973 | 0.34808  | 0.278889 |
| 6 | 4.960746 | 0.706102 | -1.65475 |
| 1 | 5.882123 | 1.071122 | -2.09758 |
| 6 | 3.787826 | 0.6247   | -2.42075 |
| 1 | 3.801011 | 0.92411  | -3.46494 |
| 6 | 2.608392 | 0.155742 | -1.86231 |
| 1 | 1.731984 | 0.088293 | -2.49863 |
| 6 | 2.538207 | -0.24347 | -0.50905 |
| 6 | -3.24123 | -0.06357 | 0.254318 |
| 1 | -4.23738 | -0.05589 | -0.19902 |
| 1 | -3.3407  | -0.50208 | 1.253632 |
| 6 | -2.69403 | 1.342592 | 0.344305 |
| 6 | -1.7272  | 1.677702 | 1.302949 |
| 1 | -1.36922 | 0.917535 | 1.991989 |
| 6 | -1.21213 | 2.972484 | 1.367649 |
| 1 | -0.46314 | 3.215814 | 2.115341 |
| 6 | -1.65711 | 3.951292 | 0.477419 |
| 1 | -1.25816 | 4.959923 | 0.531453 |
| 6 | -2.61954 | 3.628503 | -0.48037 |
| 1 | -2.97509 | 4.385514 | -1.17345 |
| 6 | -3.13245 | 2.332655 | -0.54512 |
| 1 | -3.88835 | 2.088378 | -1.28809 |
| 1 | -0.90194 | -1.60113 | 0.936387 |

**Table 6.** Optimized structure coordinates of conformer of **1** previously reported.

| <b>Atomic number</b> | <b>x</b> | <b>y</b> | <b>z</b> |
|----------------------|----------|----------|----------|
| 8                    | 0.187365 | 1.738117 | 0.638063 |
| 8                    | -1.79427 | -1.6549  | 1.983189 |
| 1                    | -2.33536 | -2.06847 | 2.677905 |
| 8                    | -3.06909 | -3.02562 | 0.72631  |
| 7                    | -0.4544  | -0.63918 | -0.07592 |
| 1                    | -0.67159 | 0.306008 | 0.296456 |
| 6                    | 1.834974 | 0.105688 | 0.050536 |
| 6                    | 1.40042  | 1.437756 | 0.474003 |
| 6                    | 2.435608 | 2.436253 | 0.69266  |
| 1                    | 2.097882 | 3.420685 | 0.999544 |
| 6                    | 3.747949 | 2.145286 | 0.521716 |

|   |          |          |          |
|---|----------|----------|----------|
| 1 | 4.50111  | 2.911758 | 0.693013 |
| 6 | 5.584975 | 0.584933 | -0.03697 |
| 1 | 6.286147 | 1.394867 | 0.148295 |
| 6 | 6.04534  | -0.66408 | -0.41546 |
| 1 | 7.108493 | -0.84894 | -0.53239 |
| 6 | 5.116369 | -1.69113 | -0.64082 |
| 1 | 5.461124 | -2.67928 | -0.932   |
| 6 | 3.756885 | -1.46207 | -0.49128 |
| 1 | 3.078837 | -2.29119 | -0.66552 |
| 6 | 3.255976 | -0.19578 | -0.1151  |
| 6 | 4.207501 | 0.83921  | 0.119292 |
| 6 | 0.853678 | -0.84655 | -0.21932 |
| 1 | 1.130106 | -1.83263 | -0.58616 |
| 6 | -1.47091 | -1.61282 | -0.40444 |
| 1 | -0.97443 | -2.47469 | -0.86759 |
| 6 | -2.20545 | -2.18099 | 0.816839 |
| 6 | -2.50762 | -1.07041 | -1.43027 |
| 1 | -1.94621 | -0.76139 | -2.31779 |
| 1 | -3.1403  | -1.91559 | -1.7139  |
| 6 | -3.36602 | 0.069466 | -0.92129 |
| 6 | -4.63809 | -0.18688 | -0.38841 |
| 1 | -5.00351 | -1.20924 | -0.35    |
| 6 | -5.43281 | 0.854522 | 0.090865 |
| 1 | -6.41798 | 0.638352 | 0.494213 |
| 6 | -4.96613 | 2.169233 | 0.047992 |
| 1 | -5.58471 | 2.980713 | 0.420025 |
| 6 | -3.70146 | 2.435718 | -0.4776  |
| 1 | -3.32704 | 3.454279 | -0.51187 |
| 6 | -2.9094  | 1.394639 | -0.96272 |
| 1 | -1.92447 | 1.616248 | -1.36264 |

**Table 7.** Fractional atomic coordinates ( $\times 10^4$ ) and equivalent isotropic displacement parameters ( $\text{\AA}^2 \times 10^3$ ) for the crystal structure of **1**.  $U_{eq}$  is defined as 1/3 of the trace of the orthogonalized  $U_{ij}$  tensor.

| Atom | $x$        | $y$        | $z$     | $U(eq)$ |
|------|------------|------------|---------|---------|
| O1   | 4334.0(18) | 1780.4(13) | 8988(2) | 58.7(7) |
| O2   | 5830(2)    | 2121.7(15) | 5623(2) | 65.5(8) |
| O3   | 5385(2)    | 2524.3(14) | 7060(3) | 71.8(8) |
| N1   | 5010.8(17) | 1170.8(16) | 7589(2) | 39.1(6) |
| C1   | 4232.3(18) | 492.9(18)  | 8602(2) | 36.2(7) |
| C2   | 4068(2)    | 1139.5(19) | 9171(3) | 43.5(8) |
| C3   | 3603(2)    | 1052(2)    | 9962(3) | 50.3(9) |

|      |            |             |          |          |
|------|------------|-------------|----------|----------|
| C4   | 3331(2)    | 385(2)      | 10163(3) | 49.3(9)  |
| C5   | 3492.7(19) | -274.8(19)  | 9628(3)  | 40.6(7)  |
| C6   | 3204(2)    | -968(2)     | 9863(3)  | 52.3(9)  |
| C7   | 3359(3)    | -1601(2)    | 9346(4)  | 61.5(10) |
| C8   | 3817(3)    | -1561(2)    | 8584(4)  | 57.1(9)  |
| C9   | 4107(2)    | -892.8(19)  | 8336(3)  | 45.9(8)  |
| C10  | 3951.5(19) | -227.9(17)  | 8838(3)  | 35.7(7)  |
| C11  | 4675.6(19) | 557.5(18)   | 7800(3)  | 35.8(6)  |
| C12  | 5483(2)    | 1222.1(17)  | 6776(3)  | 38.9(7)  |
| C13  | 5552(2)    | 2032.9(19)  | 6500(3)  | 47.0(8)  |
| C14  | 6378(2)    | 879(2)      | 7331(3)  | 49.4(8)  |
| C15  | 6345(2)    | 55(2)       | 7540(3)  | 43.8(8)  |
| C16  | 6571(2)    | -224(2)     | 8694(3)  | 52.1(9)  |
| C17  | 6490(3)    | -969(3)     | 8881(4)  | 65.0(11) |
| C18  | 6177(3)    | -1447(3)    | 7932(4)  | 67.5(11) |
| C19  | 5957(3)    | -1177(2)    | 6778(4)  | 65.6(11) |
| C20  | 6043(2)    | -433(2)     | 6586(3)  | 54.7(9)  |
| O1A  | 681(2)     | -1629.4(14) | 4656(2)  | 62.7(7)  |
| O2A  | -829(2)    | -1976.4(15) | -183(2)  | 62.6(7)  |
| O3A  | -337(2)    | -2376.4(14) | 1719(2)  | 69.0(8)  |
| N1A  | -20.3(17)  | -1011.2(16) | 2597(2)  | 39.5(6)  |
| C1A  | 764(2)     | -336.7(18)  | 4399(3)  | 36.7(7)  |
| C2A  | 943(2)     | -991(2)     | 5119(3)  | 45.4(8)  |
| C3A  | 1414(2)    | -918(2)     | 6382(3)  | 53.9(9)  |
| C4A  | 1683(2)    | -254(2)     | 6876(3)  | 51.6(9)  |
| C5A  | 1516(2)    | 414(2)      | 6195(3)  | 43.0(8)  |
| C6A  | 1796(2)    | 1102(2)     | 6753(3)  | 54.7(10) |
| C7A  | 1623(3)    | 1743(2)     | 6102(4)  | 61.9(10) |
| C8A  | 1171(3)    | 1715(2)     | 4874(4)  | 58.9(10) |
| C9A  | 889(2)     | 1050.5(19)  | 4303(3)  | 46.9(8)  |
| C10A | 1052.8(19) | 380.5(18)   | 4939(3)  | 37.3(7)  |
| C11A | 301.6(19)  | -394.0(18)  | 3154(3)  | 36.2(7)  |
| C12A | -494(2)    | -1073.2(18) | 1310(3)  | 39.0(7)  |
| C13A | -533(2)    | -1886.1(19) | 980(3)   | 45.8(8)  |
| C14A | -1396(2)   | -762(2)     | 944(3)   | 51.3(9)  |
| C15A | -1430(2)   | 57(2)       | 1122(3)  | 46.6(8)  |
| C16A | -1707(2)   | 350(2)      | 1991(4)  | 58.4(10) |
| C17A | -1714(3)   | 1107(3)     | 2162(5)  | 77.4(14) |
| C18A | -1436(3)   | 1577(3)     | 1484(5)  | 88.0(16) |
| C19A | -1163(4)   | 1300(3)     | 631(5)   | 82.3(14) |
| C20A | -1164(3)   | 545(2)      | 440(4)   | 62.4(10) |

**Table 8.** Anisotropic displacement parameters ( $\text{\AA}^2 \times 10^3$ ) for the crystal structure of **1**. The anisotropic displacement factor exponent takes the form:  $-2\pi^2[h^2a^*^2U_{11}+2hka^*b^*U_{12}+\dots]$

| Atom | $U_{11}$ | $U_{22}$ | $U_{33}$ | $U_{23}$ | $U_{13}$ | $U_{12}$ |
|------|----------|----------|----------|----------|----------|----------|
|------|----------|----------|----------|----------|----------|----------|

|      |          |          |          |           |          |           |
|------|----------|----------|----------|-----------|----------|-----------|
| O1   | 83.0(19) | 49.2(15) | 55.7(15) | -12.1(12) | 39.3(14) | -8.7(13)  |
| O2   | 109(2)   | 45.3(16) | 62.2(17) | 8.0(13)   | 54.6(17) | -2.0(15)  |
| O3   | 118(3)   | 44.8(15) | 71.5(18) | -2.3(14)  | 56.8(19) | -1.5(16)  |
| N1   | 44.2(15) | 42.1(16) | 34.0(13) | -2.3(12)  | 17.6(12) | -3.8(12)  |
| C1   | 34.3(16) | 47.3(18) | 27.2(14) | -0.4(12)  | 11.2(13) | -1.5(13)  |
| C2   | 46.2(18) | 51(2)    | 34.5(16) | -7.1(14)  | 16.1(14) | -3.9(15)  |
| C3   | 56(2)    | 61(2)    | 41.3(18) | -12.2(16) | 26.3(17) | 1.0(17)   |
| C4   | 41.9(18) | 76(3)    | 37.5(17) | -2.5(17)  | 22.8(15) | -2.9(17)  |
| C5   | 32.4(15) | 57(2)    | 30.9(15) | 3.2(14)   | 9.7(13)  | -1.3(14)  |
| C6   | 44.4(19) | 70(3)    | 46(2)    | 12.8(18)  | 21.5(16) | -2.8(17)  |
| C7   | 65(2)    | 55(2)    | 69(3)    | 12(2)     | 30(2)    | -9.0(19)  |
| C8   | 64(2)    | 48(2)    | 63(2)    | 1.6(17)   | 28(2)    | -2.4(18)  |
| C9   | 48.2(19) | 50(2)    | 44.5(18) | 0.0(15)   | 22.3(16) | -1.8(15)  |
| C10  | 31.1(15) | 47.6(18) | 26.7(14) | 4.0(12)   | 8.6(12)  | -1.5(13)  |
| C11  | 34.1(15) | 44.4(17) | 28.2(14) | -0.4(12)  | 10.5(12) | -0.9(13)  |
| C12  | 44.9(18) | 41.2(17) | 33.0(16) | 1.7(13)   | 17.1(14) | -4.2(14)  |
| C13  | 56(2)    | 48(2)    | 38.6(18) | 3.9(15)   | 18.5(16) | -4.6(16)  |
| C14  | 44.4(19) | 54(2)    | 53(2)    | 6.9(16)   | 21.0(17) | -3.5(16)  |
| C15  | 33.9(16) | 54(2)    | 45.2(18) | 7.3(16)   | 16.7(14) | 1.3(15)   |
| C16  | 41.3(18) | 70(2)    | 42.6(18) | 6.2(17)   | 11.8(15) | -3.3(17)  |
| C17  | 51(2)    | 80(3)    | 60(2)    | 28(2)     | 14.6(19) | 1(2)      |
| C18  | 53(2)    | 57(2)    | 86(3)    | 17(2)     | 16(2)    | 3.5(19)   |
| C19  | 62(3)    | 62(3)    | 69(3)    | -11(2)    | 19(2)    | 1(2)      |
| C20  | 55(2)    | 66(2)    | 44.2(19) | 3.2(17)   | 19.4(17) | 8.7(18)   |
| O1A  | 90(2)    | 49.4(16) | 46.2(14) | 9.0(12)   | 22.1(14) | -10.4(14) |
| O2A  | 88(2)    | 49.9(16) | 45.1(14) | -10.5(12) | 18.0(14) | 3.8(15)   |
| O3A  | 103(2)   | 47.9(15) | 53.3(16) | 4.5(13)   | 24.6(16) | 0.8(15)   |
| N1A  | 44.7(15) | 43.8(16) | 31.2(13) | 2.4(12)   | 15.2(11) | -2.7(12)  |
| C1A  | 36.0(15) | 44.6(18) | 32.7(15) | 5.3(13)   | 16.1(13) | -0.6(13)  |
| C2A  | 49.1(19) | 54(2)    | 36.6(17) | 8.1(15)   | 19.8(15) | -1.4(16)  |
| C3A  | 55(2)    | 68(2)    | 35.4(17) | 17.1(17)  | 12.4(16) | -0.9(18)  |
| C4A  | 39.7(18) | 82(3)    | 29.1(15) | 4.3(17)   | 7.9(14)  | -0.4(17)  |
| C5A  | 32.1(15) | 62(2)    | 38.0(16) | -4.7(15)  | 16.5(13) | -1.3(15)  |
| C6A  | 42.7(19) | 77(3)    | 43.0(19) | -14.0(19) | 13.6(16) | -1.5(18)  |
| C7A  | 59(2)    | 62(3)    | 64(2)    | -22(2)    | 22(2)    | -2.6(19)  |
| C8A  | 61(2)    | 52(2)    | 64(2)    | -3.8(19)  | 23(2)    | 7.0(18)   |
| C9A  | 51(2)    | 48(2)    | 41.2(18) | -3.6(15)  | 15.6(16) | 5.5(15)   |
| C10A | 29.3(14) | 53(2)    | 32.0(15) | -1.7(14)  | 14.5(12) | 2.2(13)   |
| C11A | 34.4(15) | 43.8(17) | 33.5(15) | 4.6(13)   | 16.0(13) | 1.2(13)   |
| C12A | 40.7(17) | 44.8(18) | 33.4(16) | -2.3(13)  | 15.5(14) | -3.7(14)  |
| C13A | 46.5(19) | 51(2)    | 43.3(19) | -5.5(16)  | 20.7(16) | -1.4(16)  |
| C14A | 41.3(19) | 53(2)    | 57(2)    | -9.9(17)  | 14.2(16) | -3.7(16)  |
| C15A | 35.8(17) | 55(2)    | 42.7(18) | -3.0(16)  | 6.5(14)  | 5.7(15)   |
| C16A | 48(2)    | 74(3)    | 54(2)    | -9.4(19)  | 20.1(18) | 3.5(18)   |
| C17A | 69(3)    | 90(4)    | 75(3)    | -29(3)    | 29(2)    | 8(3)      |
| C18A | 83(4)    | 65(3)    | 116(4)   | -21(3)    | 36(3)    | 5(3)      |
| C19A | 93(4)    | 62(3)    | 100(4)   | 10(3)     | 44(3)    | 4(3)      |
| C20A | 67(3)    | 67(3)    | 57(2)    | -0.8(19)  | 28(2)    | 10(2)     |



**Table 9.** Bond lengths for the crystal structure of **1**.

| Atom | Atom | Length/Å |
|------|------|----------|
| O1   | C2   | 1.286(4) |
| O2   | C13  | 1.297(4) |
| O3   | C13  | 1.200(4) |
| N1   | C11  | 1.307(4) |
| N1   | C12  | 1.459(4) |
| C1   | C2   | 1.424(4) |
| C1   | C10  | 1.445(4) |
| C1   | C11  | 1.411(4) |
| C2   | C3   | 1.432(5) |
| C3   | C4   | 1.340(5) |
| C4   | C5   | 1.420(5) |
| C5   | C6   | 1.406(5) |
| C5   | C10  | 1.418(4) |
| C6   | C7   | 1.365(6) |
| C7   | C8   | 1.386(5) |
| C8   | C9   | 1.371(5) |
| C9   | C10  | 1.405(5) |
| C12  | C13  | 1.512(5) |
| C12  | C14  | 1.543(5) |
| C14  | C15  | 1.511(5) |
| C15  | C16  | 1.381(5) |
| C15  | C20  | 1.380(5) |
| C16  | C17  | 1.375(6) |
| C17  | C18  | 1.366(6) |
| C18  | C19  | 1.376(6) |
| C19  | C20  | 1.379(6) |
| O1A  | C2A  | 1.285(4) |
| O2A  | C13A | 1.300(4) |
| O3A  | C13A | 1.206(4) |
| N1A  | C11A | 1.309(4) |
| N1A  | C12A | 1.454(4) |
| C1A  | C2A  | 1.424(4) |
| C1A  | C10A | 1.448(4) |
| C1A  | C11A | 1.408(4) |
| C2A  | C3A  | 1.431(5) |
| C3A  | C4A  | 1.340(5) |
| C4A  | C5A  | 1.422(5) |
| C5A  | C6A  | 1.407(5) |
| C5A  | C10A | 1.416(4) |
| C6A  | C7A  | 1.363(6) |
| C7A  | C8A  | 1.384(6) |
| C8A  | C9A  | 1.375(5) |
| C9A  | C10A | 1.399(5) |
| C12A | C13A | 1.513(5) |
| C12A | C14A | 1.530(5) |
| C14A | C15A | 1.496(5) |
| C15A | C16A | 1.382(5) |
| C15A | C20A | 1.376(5) |

|      |      |          |
|------|------|----------|
| C16A | C17A | 1.380(6) |
| C17A | C18A | 1.364(7) |
| C18A | C19A | 1.351(7) |
| C19A | C20A | 1.381(6) |

**Table 10.** Bond angles for the crystal structure of **1**.

| Atom | Atom | Atom | Angle/°  |
|------|------|------|----------|
| C11  | N1   | C12  | 123.9(3) |
| C2   | C1   | C10  | 120.8(3) |
| C11  | C1   | C2   | 119.5(3) |
| C11  | C1   | C10  | 119.6(3) |
| O1   | C2   | C1   | 121.2(3) |
| O1   | C2   | C3   | 121.0(3) |
| C1   | C2   | C3   | 117.8(3) |
| C4   | C3   | C2   | 121.2(3) |
| C3   | C4   | C5   | 122.7(3) |
| C6   | C5   | C4   | 121.4(3) |
| C6   | C5   | C10  | 119.7(3) |
| C10  | C5   | C4   | 119.0(3) |
| C7   | C6   | C5   | 121.2(3) |
| C6   | C7   | C8   | 119.4(4) |
| C9   | C8   | C7   | 120.8(4) |
| C8   | C9   | C10  | 121.6(3) |
| C5   | C10  | C1   | 118.5(3) |
| C9   | C10  | C1   | 124.2(3) |
| C9   | C10  | C5   | 117.3(3) |
| N1   | C11  | C1   | 124.7(3) |
| N1   | C12  | C13  | 107.9(3) |
| N1   | C12  | C14  | 112.0(3) |
| C13  | C12  | C14  | 110.0(3) |
| O2   | C13  | C12  | 111.8(3) |
| O3   | C13  | O2   | 125.3(3) |
| O3   | C13  | C12  | 122.8(3) |
| C15  | C14  | C12  | 112.1(3) |
| C16  | C15  | C14  | 120.6(3) |
| C20  | C15  | C14  | 121.1(3) |
| C20  | C15  | C16  | 118.2(3) |
| C17  | C16  | C15  | 120.6(4) |
| C18  | C17  | C16  | 121.0(4) |
| C17  | C18  | C19  | 119.1(4) |
| C18  | C19  | C20  | 120.2(4) |
| C19  | C20  | C15  | 121.0(4) |
| C11A | N1A  | C12A | 124.7(3) |
| C2A  | C1A  | C10A | 120.6(3) |
| C11A | C1A  | C2A  | 119.3(3) |
| C11A | C1A  | C10A | 120.2(3) |
| O1A  | C2A  | C1A  | 121.3(3) |
| O1A  | C2A  | C3A  | 120.5(3) |
| C1A  | C2A  | C3A  | 118.2(3) |

|      |      |      |          |
|------|------|------|----------|
| C4A  | C3A  | C2A  | 121.0(3) |
| C3A  | C4A  | C5A  | 122.8(3) |
| C6A  | C5A  | C4A  | 121.0(3) |
| C6A  | C5A  | C10A | 120.0(3) |
| C10A | C5A  | C4A  | 119.1(3) |
| C7A  | C6A  | C5A  | 120.9(3) |
| C6A  | C7A  | C8A  | 119.5(4) |
| C9A  | C8A  | C7A  | 120.9(4) |
| C8A  | C9A  | C10A | 121.3(3) |
| C5A  | C10A | C1A  | 118.4(3) |
| C9A  | C10A | C1A  | 124.2(3) |
| C9A  | C10A | C5A  | 117.4(3) |
| N1A  | C11A | C1A  | 124.5(3) |
| N1A  | C12A | C13A | 107.7(3) |
| N1A  | C12A | C14A | 112.7(3) |
| C13A | C12A | C14A | 109.6(3) |
| O2A  | C13A | C12A | 111.2(3) |
| O3A  | C13A | O2A  | 125.6(3) |
| O3A  | C13A | C12A | 123.1(3) |
| C15A | C14A | C12A | 114.0(3) |
| C16A | C15A | C14A | 121.6(3) |
| C20A | C15A | C14A | 120.7(3) |
| C20A | C15A | C16A | 117.7(4) |
| C17A | C16A | C15A | 120.8(4) |
| C18A | C17A | C16A | 120.3(4) |
| C19A | C18A | C17A | 119.7(5) |
| C18A | C19A | C20A | 120.5(5) |
| C15A | C20A | C19A | 121.0(4) |

**Table 11.** Torsion angles for the crystal structure of **1**.

| <b>A</b> | <b>B</b> | <b>C</b> | <b>D</b> | <b>Angle/°</b> |
|----------|----------|----------|----------|----------------|
| O1       | C2       | C3       | C4       | -179.4(3)      |
| N1       | C12      | C13      | O2       | -168.7(3)      |
| N1       | C12      | C13      | O3       | 13.0(5)        |
| N1       | C12      | C14      | C15      | 64.2(4)        |
| C1       | C2       | C3       | C4       | 0.0(5)         |
| C2       | C1       | C10      | C5       | 1.3(4)         |
| C2       | C1       | C10      | C9       | -178.4(3)      |
| C2       | C1       | C11      | N1       | 5.1(4)         |
| C2       | C3       | C4       | C5       | 0.9(6)         |
| C3       | C4       | C5       | C6       | 179.5(3)       |
| C3       | C4       | C5       | C10      | -0.8(5)        |
| C4       | C5       | C6       | C7       | 179.9(3)       |
| C4       | C5       | C10      | C1       | -0.4(4)        |
| C4       | C5       | C10      | C9       | 179.3(3)       |
| C5       | C6       | C7       | C8       | 0.6(6)         |
| C6       | C5       | C10      | C1       | 179.3(3)       |
| C6       | C5       | C10      | C9       | -1.0(4)        |
| C6       | C7       | C8       | C9       | -0.6(6)        |

|      |      |      |      |           |
|------|------|------|------|-----------|
| C7   | C8   | C9   | C10  | -0.1(6)   |
| C8   | C9   | C10  | C1   | -179.4(3) |
| C8   | C9   | C10  | C5   | 0.9(5)    |
| C10  | C1   | C2   | O1   | 178.3(3)  |
| C10  | C1   | C2   | C3   | -1.2(4)   |
| C10  | C1   | C11  | N1   | -174.8(3) |
| C10  | C5   | C6   | C7   | 0.2(5)    |
| C11  | N1   | C12  | C13  | 164.4(3)  |
| C11  | N1   | C12  | C14  | -74.5(4)  |
| C11  | C1   | C2   | O1   | -1.6(5)   |
| C11  | C1   | C2   | C3   | 178.9(3)  |
| C11  | C1   | C10  | C5   | -178.7(3) |
| C11  | C1   | C10  | C9   | 1.6(4)    |
| C12  | N1   | C11  | C1   | 178.6(3)  |
| C12  | C14  | C15  | C16  | -108.9(4) |
| C12  | C14  | C15  | C20  | 67.4(4)   |
| C13  | C12  | C14  | C15  | -175.8(3) |
| C14  | C12  | C13  | O2   | 68.9(4)   |
| C14  | C12  | C13  | O3   | -109.4(4) |
| C14  | C15  | C16  | C17  | 176.0(3)  |
| C14  | C15  | C20  | C19  | -175.4(3) |
| C15  | C16  | C17  | C18  | -0.6(6)   |
| C16  | C15  | C20  | C19  | 1.0(5)    |
| C16  | C17  | C18  | C19  | 1.2(6)    |
| C17  | C18  | C19  | C20  | -0.6(6)   |
| C18  | C19  | C20  | C15  | -0.5(6)   |
| C20  | C15  | C16  | C17  | -0.5(5)   |
| O1A  | C2A  | C3A  | C4A  | -179.3(4) |
| N1A  | C12A | C13A | O2A  | -169.9(3) |
| N1A  | C12A | C13A | O3A  | 12.3(5)   |
| N1A  | C12A | C14A | C15A | 65.7(4)   |
| C1A  | C2A  | C3A  | C4A  | -0.2(5)   |
| C2A  | C1A  | C10A | C5A  | 0.0(4)    |
| C2A  | C1A  | C10A | C9A  | -178.5(3) |
| C2A  | C1A  | C11A | N1A  | 3.4(5)    |
| C2A  | C3A  | C4A  | C5A  | 0.5(6)    |
| C3A  | C4A  | C5A  | C6A  | 178.8(3)  |
| C3A  | C4A  | C5A  | C10A | -0.6(5)   |
| C4A  | C5A  | C6A  | C7A  | -178.9(3) |
| C4A  | C5A  | C10A | C1A  | 0.3(4)    |
| C4A  | C5A  | C10A | C9A  | 179.0(3)  |
| C5A  | C6A  | C7A  | C8A  | -0.5(6)   |
| C6A  | C5A  | C10A | C1A  | -179.1(3) |
| C6A  | C5A  | C10A | C9A  | -0.4(4)   |
| C6A  | C7A  | C8A  | C9A  | 0.4(6)    |
| C7A  | C8A  | C9A  | C10A | -0.4(6)   |
| C8A  | C9A  | C10A | C1A  | 179.0(3)  |
| C8A  | C9A  | C10A | C5A  | 0.4(5)    |
| C10A | C1A  | C2A  | O1A  | 179.0(3)  |
| C10A | C1A  | C2A  | C3A  | -0.1(5)   |
| C10A | C1A  | C11A | N1A  | -176.5(3) |

|      |      |      |      |           |
|------|------|------|------|-----------|
| C10A | C5A  | C6A  | C7A  | 0.5(5)    |
| C11A | N1A  | C12A | C13A | 164.2(3)  |
| C11A | N1A  | C12A | C14A | -74.9(4)  |
| C11A | C1A  | C2A  | O1A  | -0.9(5)   |
| C11A | C1A  | C2A  | C3A  | 180.0(3)  |
| C11A | C1A  | C10A | C5A  | 180.0(3)  |
| C11A | C1A  | C10A | C9A  | 1.4(4)    |
| C12A | N1A  | C11A | C1A  | -179.6(3) |
| C12A | C14A | C15A | C16A | -111.3(4) |
| C12A | C14A | C15A | C20A | 67.0(4)   |
| C13A | C12A | C14A | C15A | -174.4(3) |
| C14A | C12A | C13A | O2A  | 67.2(4)   |
| C14A | C12A | C13A | O3A  | -110.6(4) |
| C14A | C15A | C16A | C17A | 178.4(4)  |
| C14A | C15A | C20A | C19A | -177.5(4) |
| C15A | C16A | C17A | C18A | -0.9(7)   |
| C16A | C15A | C20A | C19A | 0.8(6)    |
| C16A | C17A | C18A | C19A | 0.8(8)    |
| C17A | C18A | C19A | C20A | 0.1(8)    |
| C18A | C19A | C20A | C15A | -0.9(8)   |
| C20A | C15A | C16A | C17A | 0.1(6)    |

**Table 12.** Hydrogen atom coordinates ( $\text{\AA}\times 10^4$ ) and isotropic displacement parameters ( $\text{\AA}^2\times 10^3$ ) for the crystal structure of **1**.

| Atom | <i>x</i> | <i>y</i>  | <i>z</i> | U(eq)  |
|------|----------|-----------|----------|--------|
| H1   | 4930(30) | 1620(20)  | 7960(30) | 56(11) |
| H3   | 3488.22  | 1466.68   | 10342.87 | 60     |
| H4   | 3024.2   | 351.89    | 10672.93 | 59     |
| H6   | 2901.44  | -996.57   | 10380.11 | 63     |
| H7   | 3159.67  | -2055.4   | 9504.04  | 74     |
| H8   | 3928.21  | -1991.41  | 8237.17  | 69     |
| H9   | 4413.31  | -879.78   | 7823.58  | 55     |
| H11  | 4733.15  | 132.92    | 7392.21  | 43     |
| H12  | 5167.03  | 961.29    | 6025.51  | 47     |
| H14A | 6688.04  | 966.4     | 6795.39  | 59     |
| H14B | 6684.32  | 1121.5    | 8091.96  | 59     |
| H16  | 6779.38  | 93.33     | 9351.27  | 63     |
| H17  | 6650.32  | -1148.82  | 9664.3   | 78     |
| H18  | 6114.72  | -1948.06  | 8065.62  | 81     |
| H19  | 5748.38  | -1497.83  | 6124.58  | 79     |
| H20  | 5896.1   | -256.29   | 5801.92  | 66     |
| H1A  | 100(30)  | -1430(20) | 3090(40) | 57(11) |
| H3A  | 1536.06  | -1338.5   | 6867.42  | 65     |
| H4A  | 1991.48  | -228.12   | 7699.48  | 62     |
| H6A  | 2103.42  | 1120.14   | 7576.94  | 66     |
| H7A  | 1807.38  | 2195.51   | 6480.19  | 74     |
| H8A  | 1055.58  | 2151.96   | 4428.55  | 71     |
| H9A  | 583.38   | 1046.29   | 3477.56  | 56     |
| H11A | 218.99   | 36.36     | 2694.68  | 43     |

|      |          |           |          |        |
|------|----------|-----------|----------|--------|
| H12A | -189.08  | -804.34   | 873.16   | 47     |
| H14C | -1701.92 | -875.81   | 101.27   | 62     |
| H14D | -1685.88 | -1010.01  | 1411     | 62     |
| H16A | -1889.67 | 34.19     | 2466.88  | 70     |
| H17A | -1909.31 | 1296.73   | 2742.97  | 93     |
| H18A | -1435.32 | 2086.63   | 1607.86  | 106    |
| H19A | -972.97  | 1620.32   | 168.35   | 99     |
| H20A | -981.39  | 362.87    | -158.43  | 75     |
| H2A  | -790(30) | -2430(16) | -410(40) | 84(15) |
| H2   | 5800(30) | 2573(15)  | 5370(40) | 74(14) |

---
